# Supplementary material for: High-precision Helicobacter pylori infection diagnosis using a dual-element multimodal gas sensor array
Source: Royal Society of Chemistry journal article supplement (doi:10.1039/d4an00520a), 2024-01-01
Supplement: d4an00520a1.pdf [file d4an00520a1.pdf]

## Supporting Information

### **High-precision *Helicobacter pylori* infection diagnosis using a dual elements multimodal gas-sensing array**

Jiaying Wu<sup>a</sup>, Shiyuan Xu<sup>a</sup>, Xuemei Liu<sup>a</sup>, Jingwen Zhao<sup>a</sup>, Zhengfu He<sup>c</sup>, Aiwu Pan<sup>b\*</sup> and Jianmin Wu<sup>a\*</sup>

<sup>a</sup> Lab of Nanomedicine and Omic-based Diagnostics, Institute of Analytical Chemistry, Department of Chemistry, Zhejiang University, Hangzhou 310058, P.R. China

<sup>b</sup> Department of Internal Medicine, The Second Affiliated Hospital Zhejiang University School of Medicine, Hangzhou 310009, P.R. China

<sup>c</sup> Department of Thoracic Surgery, Sir Run Run Shaw Hospital, School of Medicine, Zhejiang University, Hangzhou 310016, China

# Table of Contents

|                                                                                                                                                                                                      |    |
|------------------------------------------------------------------------------------------------------------------------------------------------------------------------------------------------------|----|
| Figure S1. Approval for ethical review by the human research ethics committee of the Second Affiliated Hospital of Zhejiang University School of Medicine. ....                                      | 2  |
| Figure S2. N <sub>2</sub> adsorption–desorption isotherms. ....                                                                                                                                      | 3  |
| Figure S3. (a) <i>I–V</i> curves and baseline noise ....                                                                                                                                             | 3  |
| Figure S4. Dynamic response curves of two sensing elements towards a) NO, b) H <sub>2</sub> S, c) NH <sub>3</sub> , d) Ace and f) Iso under 1) <i>G</i> , 2) <i>C</i> and 3) <i>DF</i> signals. .... | 4  |
| Figure S5. Linear fitting curves of two sensing elements towards a) NO, b) H <sub>2</sub> S, c) NH <sub>3</sub> , d) Ace and f) Iso under 1) <i>G</i> , 2) <i>C</i> and 3) <i>DF</i> signals. ....   | 5  |
| Figure S6. PCA results of 3*3 matrix multimodal GSA using a) Sum normalization, b) Maximum normalization. ....                                                                                       | 6  |
| Figure S7. PCA results of a) 1*3 matrix GSA and b) 3*2 matrix multimodal GSA. ....                                                                                                                   | 6  |
| Figure S8. PCA results of single-element GSA: a) rGO-PDDA/NH <sub>2</sub> -UiO66 and b) rGO-PDDA. ..                                                                                                 | 6  |
| Figure S9. a-b) Dynamic response curves of two sensing elements towards Iso and Ace at dry and RH = 75%. ....                                                                                        | 7  |
| Figure S10. Dynamic response curves of NH <sub>3</sub> -spiked EB and control group ....                                                                                                             | 7  |
| Figure S11. Box charts of responses in NH <sub>3</sub> -spiked EB analysis ....                                                                                                                      | 8  |
| Figure S12. Dynamic response curves of real EB specimens of <i>H. pylori</i> -positive patients and healthy individuals. ....                                                                        | 8  |
| Table S1. Dielectric constants for different gases ....                                                                                                                                              | 9  |
| Table S2. Responses matrix of multimodal GSA. ....                                                                                                                                                   | 10 |
| Table S3. LoD of multimodal GSA ....                                                                                                                                                                 | 11 |
| Table S4. Relevant information about qualified volunteers ....                                                                                                                                       | 12 |

| 浙江大学医学院附属第二医院人体研究伦理委员会伦理审查批件                                                                                                                                                                                                                                                     |                                                                                                                                                                                              |                           |                                                                                       |
|----------------------------------------------------------------------------------------------------------------------------------------------------------------------------------------------------------------------------------------------------------------------------------|----------------------------------------------------------------------------------------------------------------------------------------------------------------------------------------------|---------------------------|---------------------------------------------------------------------------------------|
| 项目受理号: 研2023-0062 事件受理号: 12023074                                                                                                                                                                                                                                                |                                                                                                                                                                                              | 批件号: (2023) 伦审研第 (0143) 号 |                                                                                       |
| 项目名称                                                                                                                                                                                                                                                                             | 基于呼气代谢指纹谱的幽门螺杆菌感染免疫标记检测技术研究                                                                                                                                                                  |                           |                                                                                       |
| 申请类型                                                                                                                                                                                                                                                                             | 注册研究: <input type="checkbox"/> 药物临床试验 <input type="checkbox"/> 器械临床试验 <input type="checkbox"/> 特医食品临床试验<br>非注册研究: <input checked="" type="checkbox"/> 临床科研 <input type="checkbox"/> 上市后产品研究  |                           |                                                                                       |
| 药/械分类                                                                                                                                                                                                                                                                            | /                                                                                                                                                                                            | 试验分期                      | /                                                                                     |
| 申办方                                                                                                                                                                                                                                                                              | 浙江大学医学院附属第二医院                                                                                                                                                                                |                           |                                                                                       |
| CRO                                                                                                                                                                                                                                                                              | /                                                                                                                                                                                            |                           |                                                                                       |
| 承担科室                                                                                                                                                                                                                                                                             | 消化内科                                                                                                                                                                                         | 主要研究者PI                   | 潘爱武                                                                                   |
| <input checked="" type="checkbox"/> 负责 <input type="checkbox"/> 参加                                                                                                                                                                                                               | 组长单位: /                                                                                                                                                                                      | 组长单位PI                    | /                                                                                     |
| 审查文件                                                                                                                                                                                                                                                                             |                                                                                                                                                                                              |                           |                                                                                       |
| 序号                                                                                                                                                                                                                                                                               | 材料名称                                                                                                                                                                                         | 版本号                       | 语言/版本日期                                                                               |
| 1                                                                                                                                                                                                                                                                                | 浙大二院人体研究申请表                                                                                                                                                                                  | V1.0                      | 中文 /2023-01-30                                                                        |
| 2                                                                                                                                                                                                                                                                                | 临床研究方案                                                                                                                                                                                       | V1.0                      | 中文 /2023-01-30                                                                        |
| 3                                                                                                                                                                                                                                                                                | 受试者知情同意书                                                                                                                                                                                     | V1.0                      | 中文 /2023-01-18                                                                        |
| 4                                                                                                                                                                                                                                                                                | 病历报告表                                                                                                                                                                                        |                           | 中文 /                                                                                  |
| 5                                                                                                                                                                                                                                                                                | GCP培训证书                                                                                                                                                                                      | V1.0                      | 中文 /2023-01-30                                                                        |
| 6                                                                                                                                                                                                                                                                                | 主要研究者简历及参加人员简介                                                                                                                                                                               | V1.0                      | 中文 /2023-01-30                                                                        |
| 7                                                                                                                                                                                                                                                                                | 研究者岗位职责                                                                                                                                                                                      | V1.0                      | 中文 /2023-01-30                                                                        |
| 8                                                                                                                                                                                                                                                                                | 临床研究项目负责人承诺书                                                                                                                                                                                 |                           | 中文 /                                                                                  |
| 审查形式                                                                                                                                                                                                                                                                             | 本次审查: <input type="checkbox"/> 会议审查 <input checked="" type="checkbox"/> 快速审查                                                                                                                 |                           |                                                                                       |
| 审查日期                                                                                                                                                                                                                                                                             | 本次审查日期: 2023-02-08                                                                                                                                                                           | 会议地点                      | /                                                                                     |
| 审查委员                                                                                                                                                                                                                                                                             | 徐荣臻 戴海斌                                                                                                                                                                                      |                           |                                                                                       |
| 审查结论                                                                                                                                                                                                                                                                             | 1. 经本人体伦理审查委员会审查, 审查结果: 同意, 意见和建议:<br>2. 该研究进行过程中将接受本伦理审查委员会的跟踪审查, 跟踪审查频率为研究批准之日起: <input type="checkbox"/> 6个月 <input checked="" type="checkbox"/> 12个月 <input type="checkbox"/> 其它 _____ ; |                           |                                                                                       |
| 主任/副主任委员签名:                                                                                                                                                                                                                                                                      | <br>日期: 2023/02/08<br>浙江大学医学院附属第二医院人体研究伦理委员会 (盖章)                                                         |                           |  |
| 研究注意事项:                                                                                                                                                                                                                                                                          |                                                                                                                                                                                              |                           |                                                                                       |
| 1. 在研究中请遵守GCP和《赫尔辛基宣言》的原则。<br>2. 严格遵循批准的方案开展研究, 研究过程中对临床研究方案、知情同意书等材料的任何修改及主要研究者变更等, 请提交修改申请, 得到伦理委员会批准后方可继续实施。<br>3. 请提前1个月提交跟踪审查申请, 本伦理委员会根据跟踪审查的结果作出新的决定。<br>4. 按要求书面上报严重不良事件, 本伦理委员会将根据严重不良事件报告作出审查决定。<br>5. 方案违背/偏离、暂停/终止均应提供书面报告。<br>6. 研究结束提供总结报告。<br>7. 及时书面报告中心伦理的重要决定。 |                                                                                                                                                                                              |                           |                                                                                       |

Figure S1. Approval for ethical review by the human research ethics committee of the Second Affiliated Hospital of Zhejiang University School of Medicine.

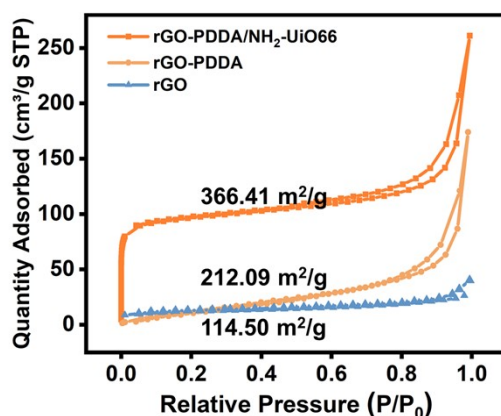

Figure S2.  $N_2$  adsorption-desorption isotherms of rGO, rGO-PDDA and rGO-PDDA/ $NH_2$ -UiO66.

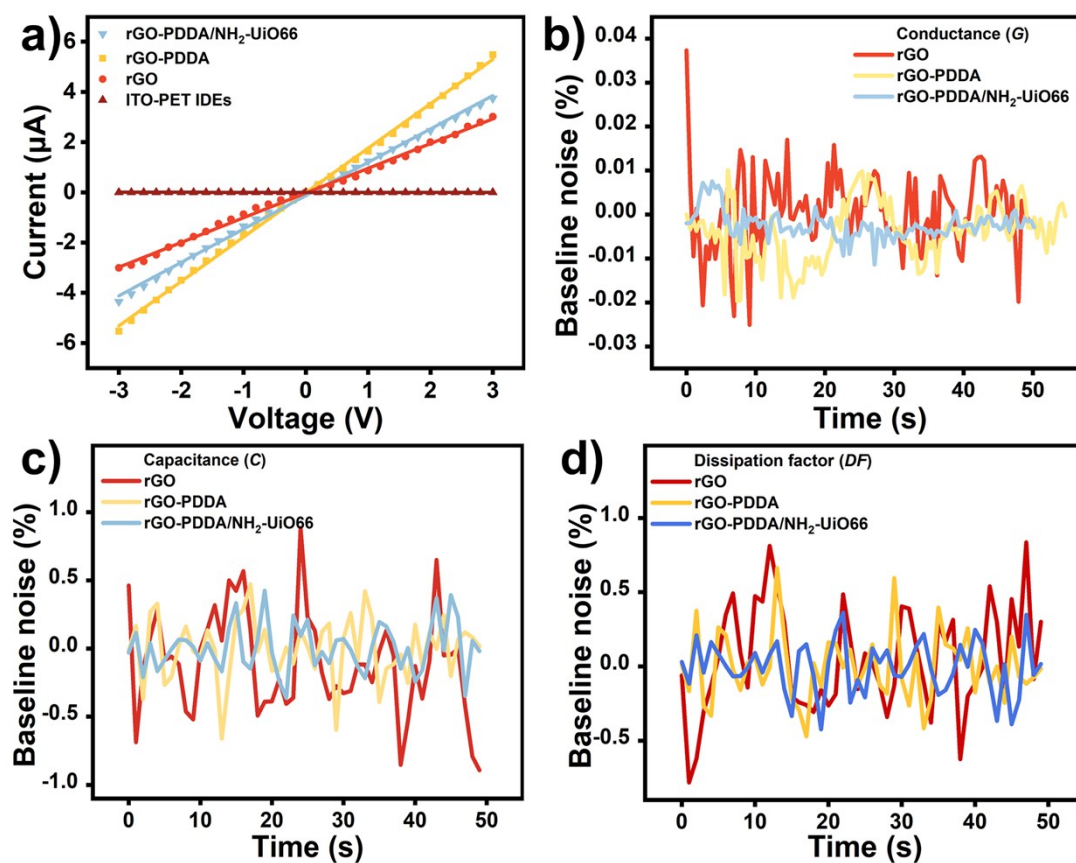

Figure S3. (a)  $I$ - $V$  curves of rGO, rGO-PDDA, rGO-PDDA/ $NH_2$ -UiO66 and baseline noise fabricated on ITO-PET IDEs under b)  $G$ , c)  $C$ , d)  $DF$  signals.

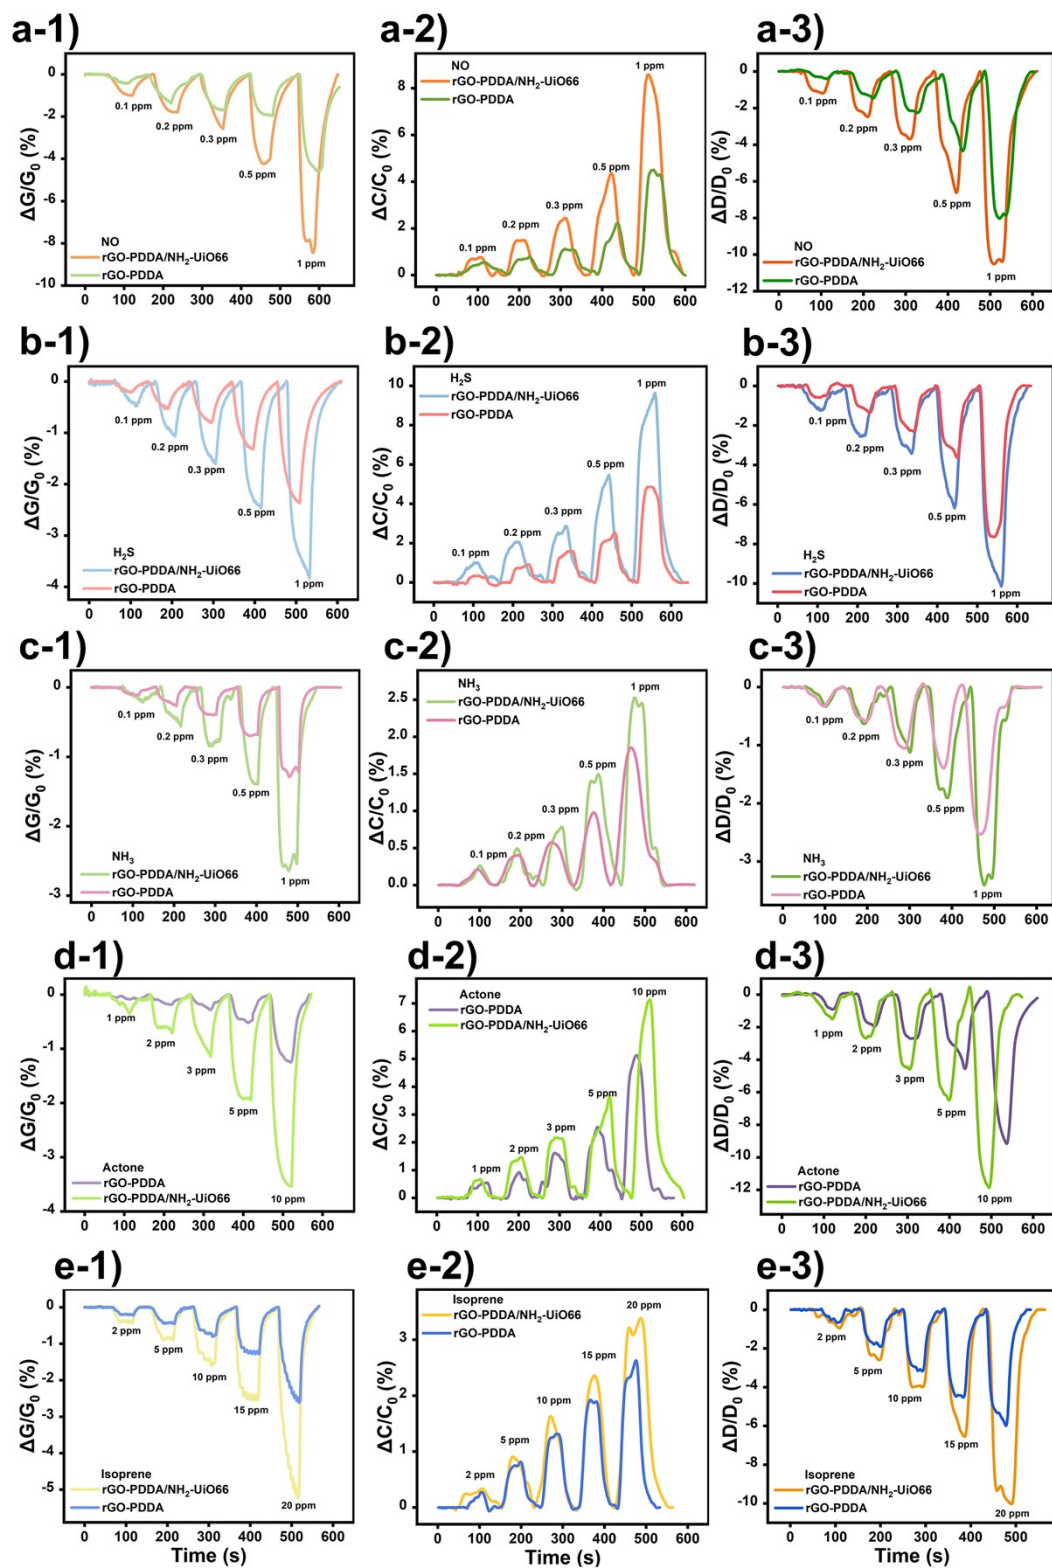

Figure S4. Dynamic response curves of two sensing elements towards a) NO, b) H<sub>2</sub>S, c) NH<sub>3</sub>, d) Ace and f) Iso under 1) *G*, 2) *C* and 3) *DF* signals.

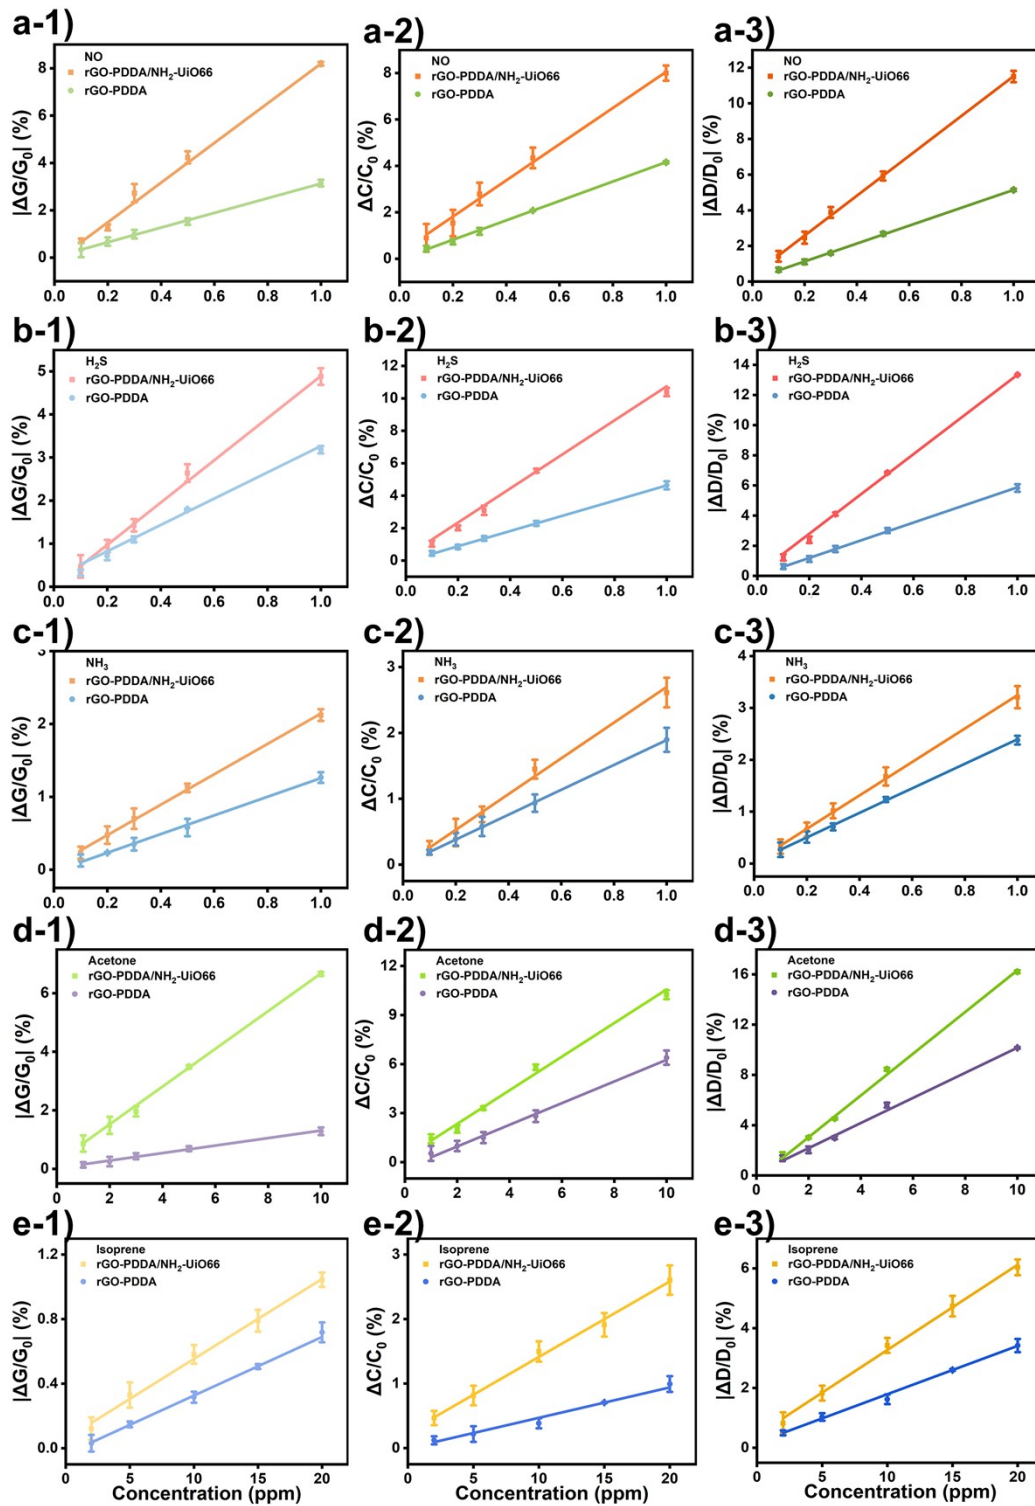

Figure S5. Linear fitting curves of two sensing elements towards a) NO, b)  $H_2S$ , c)  $NH_3$ , d) Ace and f) Iso under 1)  $G$ , 2)  $C$  and 3)  $DF$  signals.

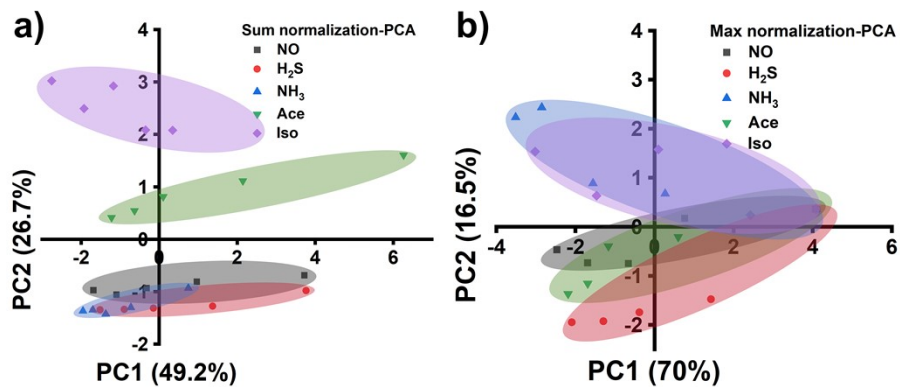

Figure S6. PCA results of 3\*3 matrix multimodal GSA using a) Sum normalization, b) Maximum normalization.

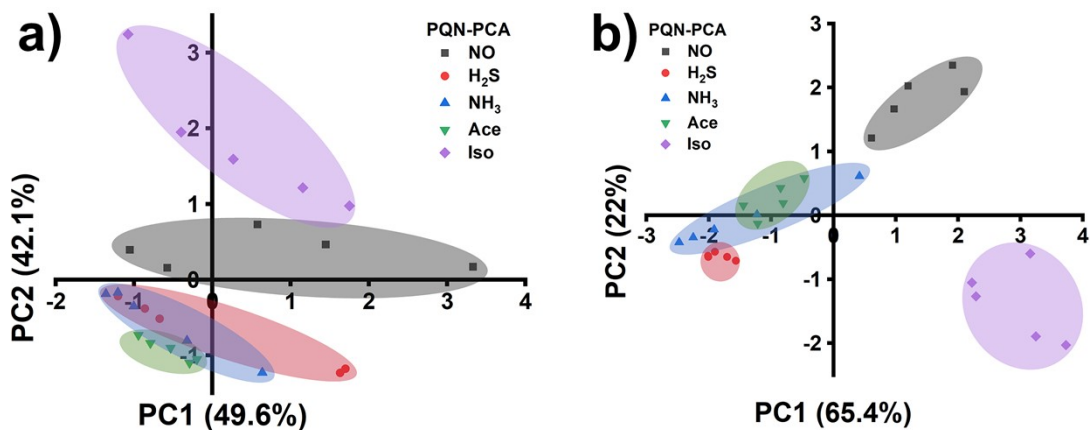

Figure S7. PCA results of a) 1\*3 matrix GSA and b) 3\*2 matrix multimodal GSA.

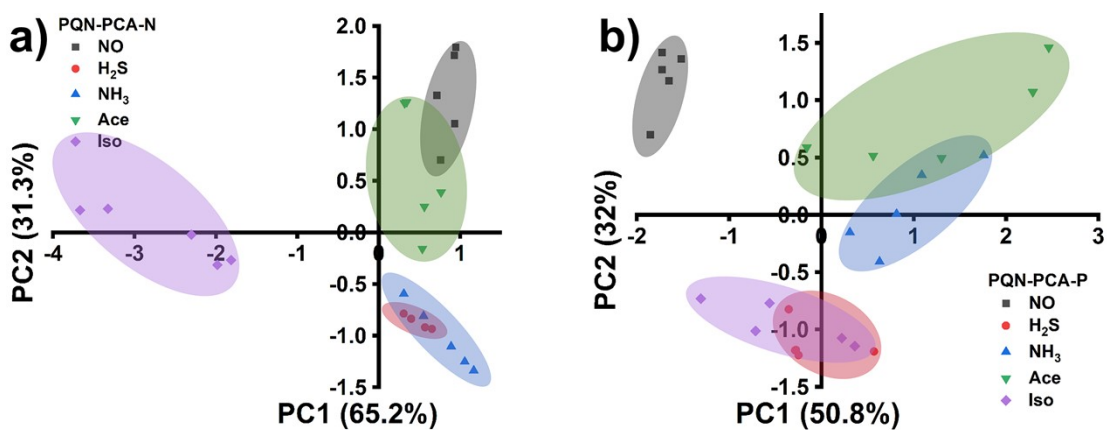

Figure S8. PCA results of single-element gas sensor: a) rGO-PDDA/NH<sub>2</sub>-UiO66 and b) rGO-PDDA.

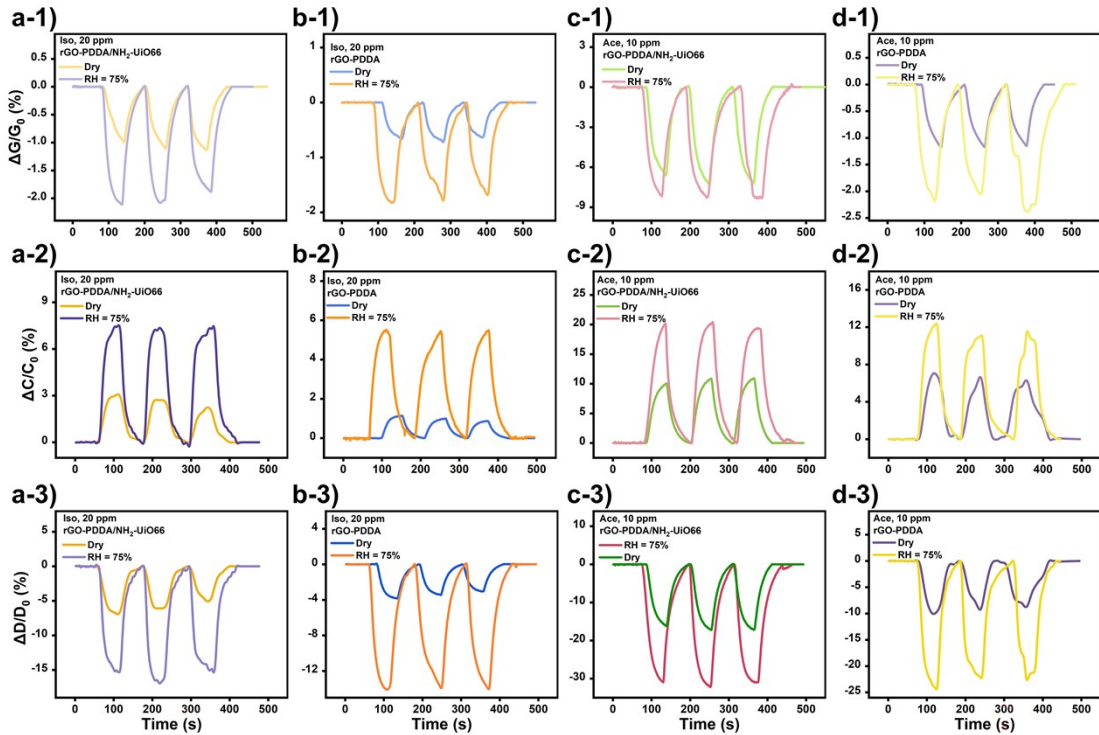

Figure S9. a-b) Dynamic response curves of two sensing elements towards Iso at dry and RH = 75% under 1) *G*, 2) *C* and 3) *DF* signals. c-d) Dynamic response curves of two sensing elements towards Ace at dry and RH = 75% under 1) *G*, 2) *C* and 3) *DF* signals.

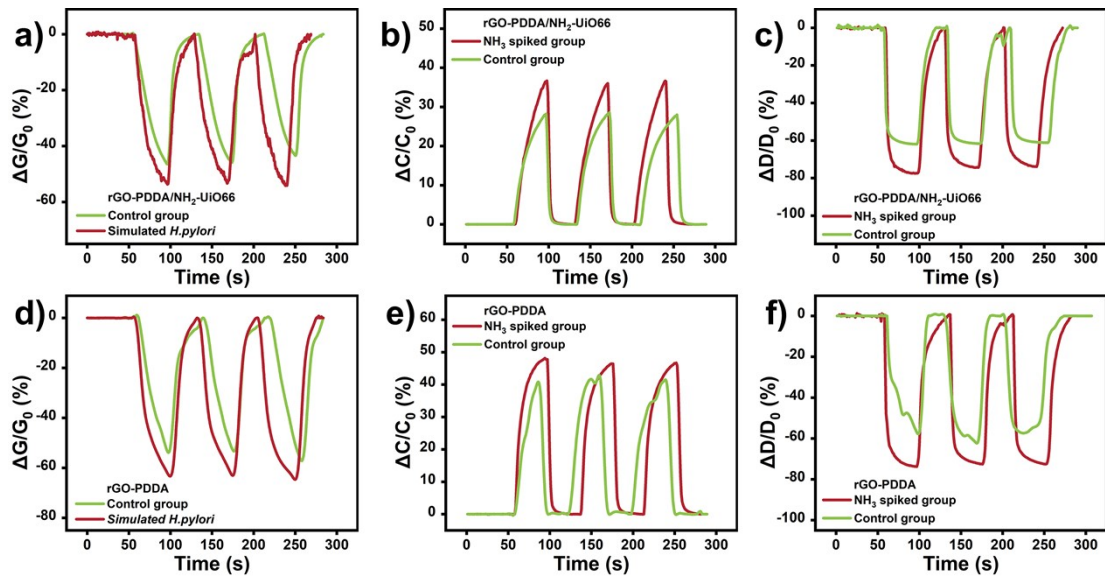

Figure S10. Dynamic response curves of NH<sub>3</sub>-spiked EB and control group of rGO-PDDA/NH<sub>2</sub>-UiO66 under a) *G*, b) *C*, c) *DF* signals and rGO-PDDA under d) *G*, e) *C*, f) *DF* signals.



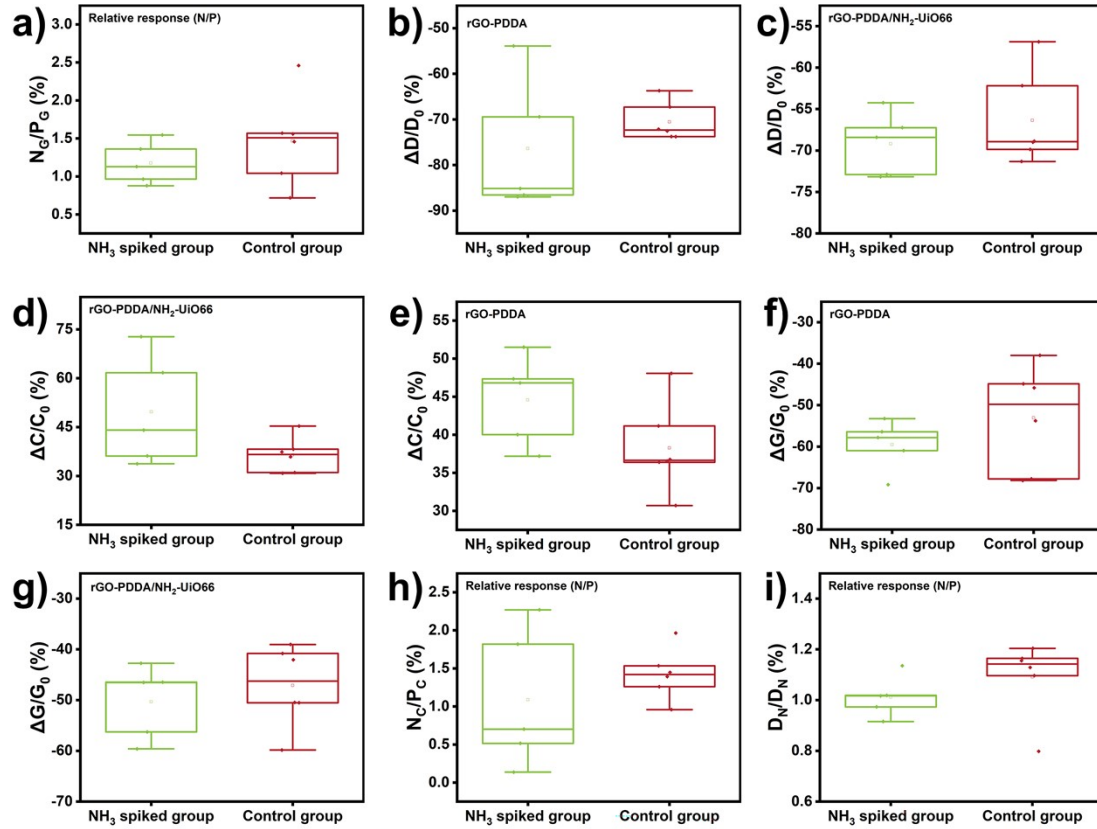

Figure S11. Box charts of responses in  $\text{NH}_3$ -spiked EB analysis (11 cases study). Responses under  $G$ ,  $D$ ,  $DF$  signals of a-c) rGO-PDDA/ $\text{NH}_2$ -UiO66, d-f) rGO-PDDA and g-i)  $RR$ .

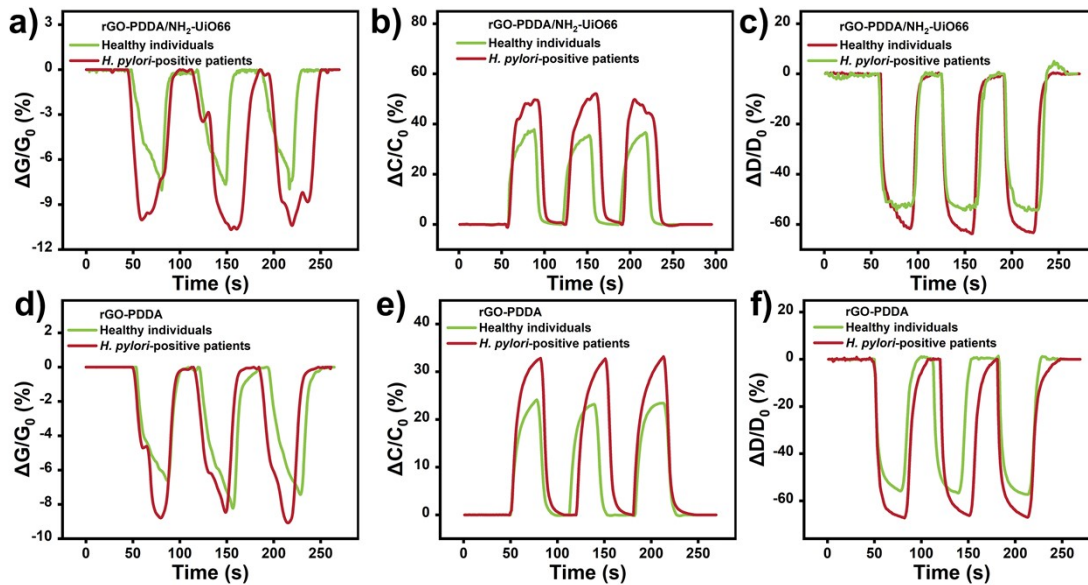

Figure S12. Dynamic response curves of real EB specimens of *H. pylori*-positive patients and healthy individuals of rGO-PDDA/ $\text{NH}_2$ -UiO66 under a)  $G$ , b)  $C$ , c)  $DF$  signals and rGO-PDDA under d)  $G$ , e)  $C$ , f)  $DF$  signals.

**Table S1. Dielectric constants for different gases**

| Gas              | Relative dielectric constant ( $\epsilon_r$ ) |
|------------------|-----------------------------------------------|
| Air              | 1.0005364                                     |
| N <sub>2</sub>   | 1.0005480                                     |
| NO               | 1.000600                                      |
| H <sub>2</sub> S | 1.00344                                       |
| NH <sub>3</sub>  | 1.00622                                       |
| Ace              | 20.7                                          |
| Iso              | 2.18                                          |
| H <sub>2</sub> O | 78.5                                          |

**Table S2. Responses matrix of multimodal GSA towards NO, H<sub>2</sub>S, NH<sub>3</sub>, Ace and Iso. G: conductance, C: capacitance, DF: dissipation factor, N: rGO-PDDA/NH<sub>2</sub>-UiO66, P: rGO-PDDA. N/P: relative response by  $R_N/R_P$ .**

| Gas              | Con. (ppm) | N-G   | N-C    | N-DF   | P-G   | P-C   | P-DF   | N/P-G | N/P-C | N/P-DF |
|------------------|------------|-------|--------|--------|-------|-------|--------|-------|-------|--------|
| NO               | 0.1        | 0.709 | 0.900  | 1.417  | 0.335 | 0.437 | 0.663  | 2.113 | 2.061 | 2.136  |
|                  | 0.2        | 1.279 | 1.537  | 2.460  | 0.759 | 0.733 | 1.110  | 1.685 | 2.095 | 2.216  |
|                  | 0.3        | 2.724 | 2.787  | 3.880  | 1.254 | 1.180 | 1.600  | 2.172 | 2.362 | 2.425  |
|                  | 0.5        | 4.236 | 4.343  | 5.923  | 2.225 | 2.077 | 2.680  | 1.903 | 2.091 | 2.210  |
|                  | 1.0        | 8.193 | 7.997  | 10.500 | 4.490 | 3.537 | 4.140  | 1.825 | 2.261 | 2.536  |
| H <sub>2</sub> S | 0.1        | 0.473 | 1.043  | 1.227  | 0.325 | 0.447 | 0.620  | 1.458 | 2.336 | 1.979  |
|                  | 0.2        | 0.943 | 2.020  | 2.400  | 0.715 | 0.840 | 1.120  | 1.318 | 2.405 | 2.143  |
|                  | 0.3        | 1.427 | 3.097  | 4.107  | 1.099 | 1.363 | 1.783  | 1.299 | 2.271 | 2.303  |
|                  | 0.5        | 2.640 | 5.543  | 6.850  | 1.792 | 2.287 | 3.010  | 1.474 | 2.424 | 2.276  |
|                  | 1.0        | 4.880 | 9.393  | 11.341 | 3.819 | 4.640 | 5.830  | 1.278 | 2.024 | 1.945  |
| NH <sub>3</sub>  | 0.1        | 0.234 | 0.254  | 0.327  | 0.127 | 0.190 | 0.267  | 1.842 | 1.339 | 1.224  |
|                  | 0.2        | 0.476 | 0.487  | 0.651  | 0.233 | 0.387 | 0.511  | 2.044 | 1.260 | 1.274  |
|                  | 0.3        | 0.701 | 0.762  | 1.016  | 0.350 | 0.579 | 0.706  | 2.001 | 1.316 | 1.438  |
|                  | 0.5        | 1.323 | 1.451  | 1.680  | 0.580 | 0.934 | 1.233  | 2.282 | 1.553 | 1.362  |
|                  | 1.0        | 2.122 | 2.613  | 3.207  | 1.265 | 1.896 | 2.378  | 1.677 | 1.378 | 1.348  |
| Ace              | 1          | 0.863 | 1.432  | 1.586  | 0.137 | 0.535 | 1.369  | 6.291 | 2.677 | 1.159  |
|                  | 2          | 1.487 | 2.027  | 3.015  | 0.250 | 0.989 | 2.037  | 5.938 | 2.049 | 1.481  |
|                  | 3          | 1.964 | 3.310  | 4.522  | 0.433 | 1.500 | 3.004  | 4.531 | 2.207 | 1.505  |
|                  | 5          | 3.485 | 6.067  | 8.450  | 0.689 | 3.091 | 5.597  | 5.058 | 1.963 | 1.510  |
|                  | 10         | 6.660 | 10.248 | 16.209 | 1.125 | 6.393 | 10.149 | 5.918 | 1.603 | 1.597  |
| Iso              | 2          | 0.607 | 0.466  | 0.822  | 0.093 | 0.121 | 0.499  | 6.533 | 3.849 | 1.647  |
|                  | 5          | 1.648 | 0.815  | 1.828  | 0.444 | 0.218 | 1.032  | 3.713 | 3.739 | 1.771  |
|                  | 10         | 2.907 | 1.498  | 3.424  | 0.949 | 0.385 | 1.623  | 3.064 | 3.887 | 2.110  |
|                  | 15         | 3.950 | 1.912  | 4.736  | 1.519 | 0.706 | 2.603  | 2.601 | 2.710 | 1.819  |
|                  | 20         | 5.221 | 2.604  | 6.032  | 2.155 | 0.993 | 3.619  | 2.423 | 2.622 | 1.667  |

**Table S3. LoD of multimodal GSA towards NO, H<sub>2</sub>S, NH<sub>3</sub> and Iso under three signals of a) rGO-PDDA/NH<sub>2</sub>-UiO66 and b) rGO-PDDA**

a)

| Gas              | Signal    | Noise (%) | Sensitivity (% / ppm) | LoD (3N/S) (ppb) |
|------------------|-----------|-----------|-----------------------|------------------|
| NO               | <i>G</i>  | 0.075     | 8.39                  | 26.98            |
|                  | <i>C</i>  | 0.107     | 8.00                  | 40.12            |
|                  | <i>DF</i> | 0.144     | 10.21                 | 42.30            |
| H <sub>2</sub> S | <i>G</i>  | 0.033     | 3.87                  | 25.26            |
|                  | <i>C</i>  | 0.065     | 6.60                  | 29.57            |
|                  | <i>DF</i> | 0.071     | 7.51                  | 28.28            |
| NH <sub>3</sub>  | <i>G</i>  | 0.016     | 1.19                  | 41.21            |
|                  | <i>C</i>  | 0.010     | 1.18                  | 24.56            |
|                  | <i>DF</i> | 0.014     | 2.35                  | 17.45            |
| Ace              | <i>G</i>  | 0.005     | 0.11                  | 121.60           |
|                  | <i>C</i>  | 0.029     | 1.35                  | 64.07            |
|                  | <i>DF</i> | 0.030     | 1.61                  | 54.89            |
| Iso              | <i>G</i>  | -0.007    | 0.25                  | 84.09            |
|                  | <i>C</i>  | -0.008    | 0.10                  | 248.79           |
|                  | <i>DF</i> | -0.013    | 0.28                  | 134.11           |

b)

| Gas              | Signal    | Noise (%) | Sensitivity (% / ppm) | LoD (3N/S) (ppb) |
|------------------|-----------|-----------|-----------------------|------------------|
| NO               | <i>G</i>  | 0.020     | 4.64                  | 12.74            |
|                  | <i>C</i>  | 0.435     | 3.21                  | 406.64           |
|                  | <i>DF</i> | 0.447     | 3.73                  | 359.98           |
| H <sub>2</sub> S | <i>G</i>  | 0.007     | 4.77                  | 4.16             |
|                  | <i>C</i>  | 0.097     | 9.29                  | 31.27            |
|                  | <i>DF</i> | 0.093     | 9.93                  | 27.95            |
| NH <sub>3</sub>  | <i>G</i>  | 0.037     | 3.25                  | 34.26            |
|                  | <i>C</i>  | 0.075     | 4.70                  | 47.96            |
|                  | <i>DF</i> | 0.093     | 5.85                  | 47.71            |
| Ace              | <i>G</i>  | 0.037     | 0.48                  | 234.32           |
|                  | <i>C</i>  | -0.103    | 0.77                  | 398.97           |
|                  | <i>DF</i> | -0.067    | 1.11                  | 181.92           |
| Iso              | <i>G</i>  | 0.018     | 0.11                  | 476.05           |
|                  | <i>C</i>  | 0.016     | 0.05                  | 893.46           |
|                  | <i>DF</i> | 0.024     | 0.13                  | 531.34           |

**Table S4. Relevant information about qualified volunteers**

| Serial No. | Age | Gender | Class                              |
|------------|-----|--------|------------------------------------|
| 1          | 49  | Male   | Healthy individual                 |
| 2          | 50  | Male   | Healthy individual                 |
| 3          | 75  | Male   | Healthy individual                 |
| 4          | 58  | Male   | Healthy individual                 |
| 5          | 53  | Male   | Healthy individual                 |
| 6          | 28  | Male   | Healthy individual                 |
| 7          | 53  | Male   | Healthy individual                 |
| 8          | 60  | Male   | Healthy individual                 |
| 9          | 40  | Male   | Healthy individual                 |
| 10         | 58  | Male   | Healthy individual                 |
| 11         | 41  | Male   | Healthy individual                 |
| 12         | 74  | Male   | Healthy individual                 |
| 13         | 37  | Male   | Healthy individual                 |
| 14         | 48  | Male   | Healthy individual                 |
| 15         | 61  | Male   | Healthy individual                 |
| 16         | 56  | Female | Healthy individual                 |
| 17         | 42  | Female | Healthy individual                 |
| 18         | 41  | Female | Healthy individual                 |
| 19         | 64  | Female | Healthy individual                 |
| 20         | 53  | Female | Healthy individual                 |
| 21         | 56  | Male   | Healthy individual                 |
| 22         | 68  | Male   | Healthy individual                 |
| 23         | 60  | Male   | Healthy individual                 |
| 24         | 37  | Male   | Healthy individual                 |
| 25         | 49  | Female | Healthy individual                 |
| 26         | 32  | Male   | Healthy individual                 |
| 27         | 57  | Female | Healthy individual                 |
| 28         | 31  | Male   | Healthy individual                 |
| 29         | 64  | Female | Healthy individual                 |
| 30         | 36  | Male   | Healthy individual                 |
| 31         | 72  | Male   | Healthy individual                 |
| 32         | 39  | Male   | Healthy individual                 |
| 33         | 32  | Male   | Healthy individual                 |
| 34         | 76  | Male   | Healthy individual                 |
| 35         | 45  | Male   | <i>H. pylori</i> -positive patient |
| 36         | 23  | Female | <i>H. pylori</i> -positive patient |
| 37         | 35  | Male   | <i>H. pylori</i> -positive patient |
| 38         | 34  | Male   | <i>H. pylori</i> -positive patient |
| 39         | 36  | Male   | <i>H. pylori</i> -positive patient |
| 40         | 33  | Female | <i>H. pylori</i> -positive patient |
| 41         | 38  | Female | <i>H. pylori</i> -positive patient |
| 42         | 34  | Male   | <i>H. pylori</i> -positive patient |

**Continued Table S4. Relevant information about qualified volunteers**

| Serial No. | Age | Gender | Class                              |
|------------|-----|--------|------------------------------------|
| 43         | 53  | Male   | <i>H. pylori</i> -positive patient |
| 44         | 62  | Male   | <i>H. pylori</i> -positive patient |
| 45         | 25  | Male   | <i>H. pylori</i> -positive patient |
| 46         | 55  | Male   | <i>H. pylori</i> -positive patient |
| 47         | 54  | Female | <i>H. pylori</i> -positive patient |
| 48         | 49  | Female | <i>H. pylori</i> -positive patient |
| 49         | 47  | Male   | <i>H. pylori</i> -positive patient |
| 50         | 46  | Male   | <i>H. pylori</i> -positive patient |
| 51         | 69  | Male   | <i>H. pylori</i> -positive patient |
| 52         | 52  | Female | <i>H. pylori</i> -positive patient |
